# Supplementary material for: A redox route for the fluorescence detection of lead ions in sorghum, river water and tap water and a desk study of a paper-based probe
Source: Royal Society of Chemistry journal article supplement (doi:10.1039/c8ay00892b), 2018-01-01
Supplement: c8ay00892b1.pdf [file c8ay00892b1.pdf]

## Support information

### **A Redox Route for the Fluorescent Detection of Lead Ions in and Desk Study of Paper-based Probe**

Pan Li<sup>1,#</sup>, Jiawei Li<sup>1,#</sup>, Minghong Bian<sup>2</sup>, Danqun Huo<sup>2,\*</sup>, Changjun Hou<sup>1,\*</sup>, Ping Yang<sup>1,3</sup>, Suyi Zhang<sup>1,3</sup>, Caihong Shen<sup>1,3</sup>, Mei Yang<sup>1</sup>

<sup>1</sup>Key Laboratory for Biorheological Science and Technology of Ministry of Education, State and Local Joint Engineering Laboratory for Vascular Implants, Bioengineering College of Chongqing University, Chongqing 400044, PR China

<sup>2</sup>Liquor Making Biology Technology and Application of Key Laboratory of Sichuan Province, College of Bioengineering, Sichuan University of Science and Engineering, Zigong 643000, PR China

<sup>3</sup>National Engineering Research Center of Solid-State Brewing, Luzhou Laojiao Group Co. Ltd., Luzhou 646000, P.R. China

# These two authors made equal contribution to this work.

\* Corresponding author. Tel.: +86 23 6511 2673; fax: +86 23 6510 2507.

E-mail addresses: houcj@cqu.edu.cn (C. Hou)

huodq23@163.com (D. Huo)

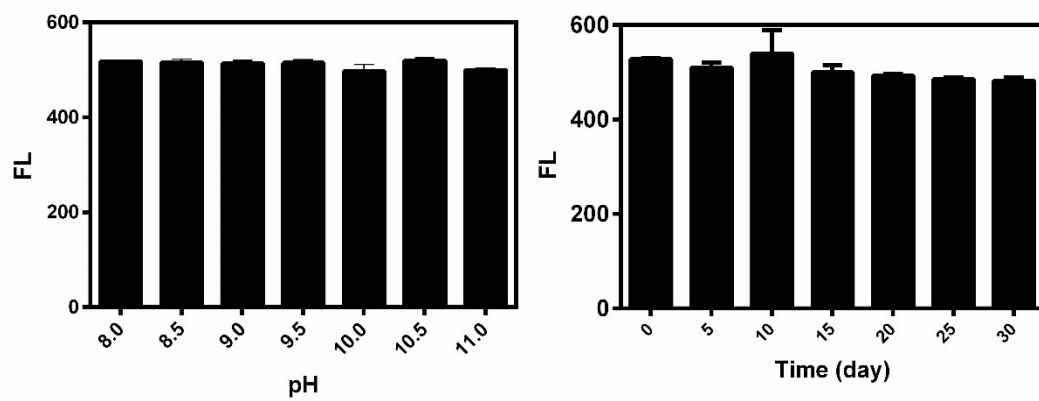

Fig.S1 Stability of BSA-Au NCs.

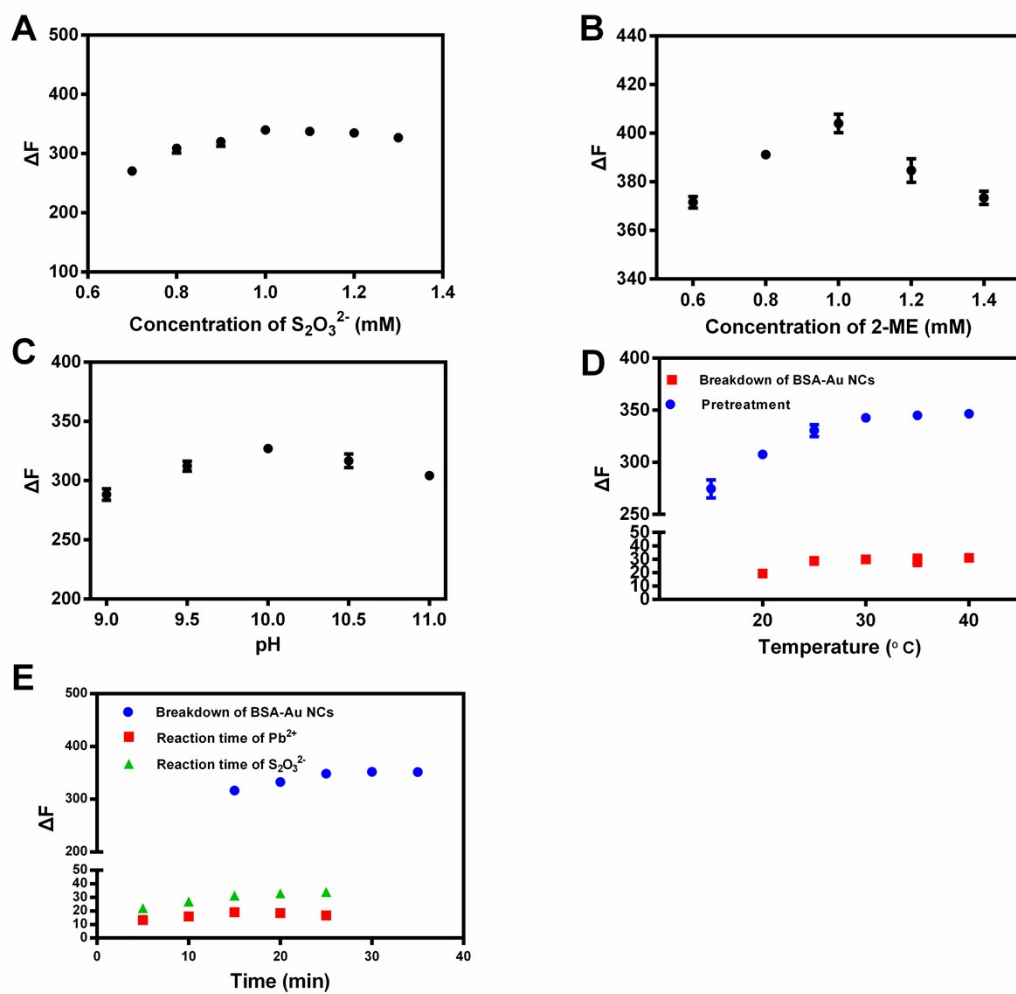

Fig.S2 Optimization of experimental conditions.
